# Supplementary material
Source: PubMed Central journal article supplement (PMC9906354)
Supplement: mmc1-sup1-appendix.pdf [file mmc1-sup1-appendix.pdf]

***Supplemental Appendix for***

**Weak antibody response to 3 doses of mRNA vaccine in kidney transplant recipients  
treated with belatacept**

**Table of contents**

**SUPPLEMENTAL RESULTS ..... Page 2**  
**Supplemental Table 1 ..... Page 2**

**Table 1: Baseline characteristics and post-vaccinal humoral responses of the 62 KTRs converted to belatacept and 35 non-belatacept-treated KTRs, who received 3 injections of BNT162b2 mRNA COVID-19 vaccine.**

| Variables                                                   | Belatacept group, N=62 | Control group, N=35 | p-value           |
|-------------------------------------------------------------|------------------------|---------------------|-------------------|
| Age, median (IQR)                                           | 63.5 (51-72)           | 51 (45-61.5)        | <b>0.007</b>      |
| Sex (Males), N (%)                                          | 36 (58)                | 14 (40)             | 0.19              |
| KT > 1, N (%)                                               | 6 (10)                 | 4 (11)              | 0.50              |
| <b>Induction Immunosuppressive therapy</b>                  |                        |                     |                   |
| Antithymocyte globulin, N (%)                               | 20 (32)                | 13 (39)             | 0.42              |
| Basiliximab, N (%)                                          | 42 (68)                | 19 (58)             |                   |
| Rituximab at induction, N (%)                               | 10 (16)                | 5 (14)              |                   |
| <b>Maintenance immunosuppressive therapy</b>                |                        |                     |                   |
| Calcineurin inhibitors, N (%)                               | 2 (3)                  | 35 (100)            | <b>&lt;0.0001</b> |
| Azathioprine, N (%)                                         | 3 (5)                  | 2 (6)               | 1.00              |
| Mycophenolic acid, N (%)                                    | 44 (71)                | 28 (82)             | 0.15              |
| Dose, median (IQR)                                          | 1000 (750-1500)        | 1000 (750-1250)     | 0.42              |
| mTOR-i (Everolimus), N (%)                                  | 8 (13)                 | 2 (6)               | 0.49              |
| Steroids, N (%)                                             | 62 (100)               | 33 (94)             | 0.93              |
| Dose, median (IQR)                                          | 7.5 (5-10)             | 5 (5-8.125)         | 0.06              |
| Belatacept, N (%)                                           | 62 (100)               | 0 (0)               | <b>&lt;0.0001</b> |
| SCr at vaccine, median (IQR)                                | 137 (105.1-180)        | 128 (105.0-153.1)   | 0.81              |
| eGFR at vaccine, median (IQR)                               | 44.4 (33.2-59.7)       | 47 (34.5-62.0)      | 0.73              |
| <b>At third vaccine injection</b>                           |                        |                     |                   |
| Time between KT and 3rd injection (years)                   | 4.8 (2.4-701)          | 3.5 (1.7-7.8)       | <b>0.69</b>       |
| Time between 3rd injection and serology, days, median (IQR) | 28 (28-33)             | 34 (28-49)          | <b>0.02</b>       |
| Positive serology after 3 injections, N (%)                 | 4 (6.4)                | 13 (37)             | <b>0.0001</b>     |

**eGFR:** estimated glomerular filtration rate, **IQR:** interquartile range, **KT:** kidney transplantation, **SCr:** serum creatinine
